# Supplementary material for: A rapid and naked-eye visible rhodamine 6G-based chemosensor for sensitive detection of copper(ii) ions in aqueous solution
Source: Royal Society of Chemistry journal article supplement (doi:10.1039/c8ay02019a), 2018-01-01
Supplement: c8ay02019a1.pdf [file c8ay02019a1.pdf]

**Appendix A. Supplementary data**

**A rapid and naked-eye visible Rhodamine 6G based chemosensor for sensitive  
detection of copper ( II ) ion in aqueous solution †**

Q. Huang<sup>a</sup>, Y. T. Chen<sup>a</sup>, Y. W. Ren<sup>a</sup>, Z. Y. Wang<sup>a</sup>, Y. X. Zhu<sup>b</sup>, Y. Zhang<sup>\* a</sup>

---

<sup>a</sup>State Key Laboratory of Marine Environmental Science (Xiamen University)

Xiamen 361005, China.

<sup>b</sup>Department of Chemistry, College of Chemistry and Chemical Engineering, Xiamen

University, Xiamen 361005, China.

†Electronic Supplementary Information (ESI) available. See DOI: 10.1039/

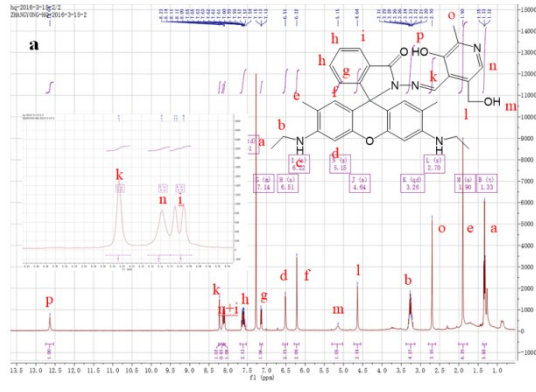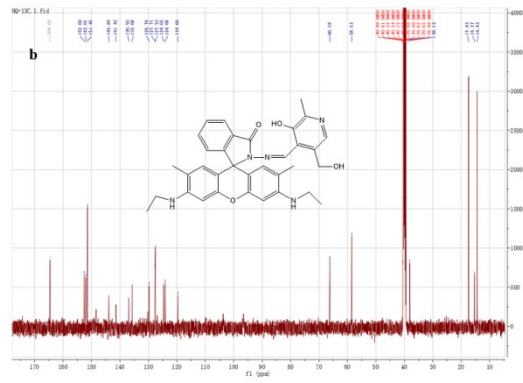

Fig. S1. The  $^1\text{H}$  NMR (a) and  $^{13}\text{C}$  NMR (b) spectra of R6GHP.

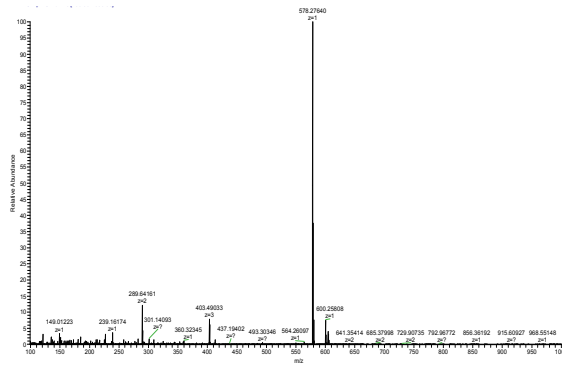

Fig. S2. The ESI-MS spectrum of R6GHP.

**Table 1s** Recovery study of environmental calibration standard of Cu (NO<sub>3</sub>)<sub>2</sub>.

| Standard samples                              | C <sub>Cu<sup>2+</sup>(μg/L)</sub> | C <sub>Cu<sup>2+</sup> found (μg/L)</sub> | Recovery (%) | RSD (%) |
|-----------------------------------------------|------------------------------------|-------------------------------------------|--------------|---------|
| The ECS of Cu (NO <sub>3</sub> ) <sub>2</sub> | 250.0                              | 234.0                                     | 93.59        | 0.50    |
|                                               | 500.0                              | 488.9                                     | 97.79        | 0.44    |

ECS means Environmental Calibration Standard.
